# Supplementary material for: Tunable full-color emission of stilbazoles containing a 2-halo-3,4-dicyanopyridine acceptor
Source: Royal Society of Chemistry journal article supplement (doi:10.1039/d3ob01326j), 2023-01-01
Supplement: d3ob01326j1.pdf [file d3ob01326j1.pdf]

## ELECTRONIC SUPPLEMENTARY INFORMATION

for

### Tunable Full-Color Emission of Stilbazoles Containing

#### 2-Halo-3,4-Dicyanopyridine Acceptor

Anastasia I. Ershova, Sergey V. Fedoseev, Sergey A. Blinov, Mikhail Yu. Ievlev,

Konstantin V. Lipin and Oleg V. Ershov\*

*Chuvash State University named after I.N. Ulyanov, Moskovsky pr., 15,*

*Cheboksary, Russia*

*\*Corresponding author. E-mail address: oleg.ershov@mail.ru*

### CONTENTS

|                                                                                         |    |
|-----------------------------------------------------------------------------------------|----|
| 1. NMR spectra of compounds <b>2</b> , <b>3</b> , <b>6</b> and <b>7</b> .....           | 2  |
| 2. Photo-physical characteristics of compounds <b>2</b> , <b>6</b> and <b>7</b> .....   | 14 |
| 3. Calculation of charge-transfer properties of compounds <b>2c</b> and <b>2i</b> ..... | 18 |

# 1. NMR spectra of compounds 2, 3, 6 and 7

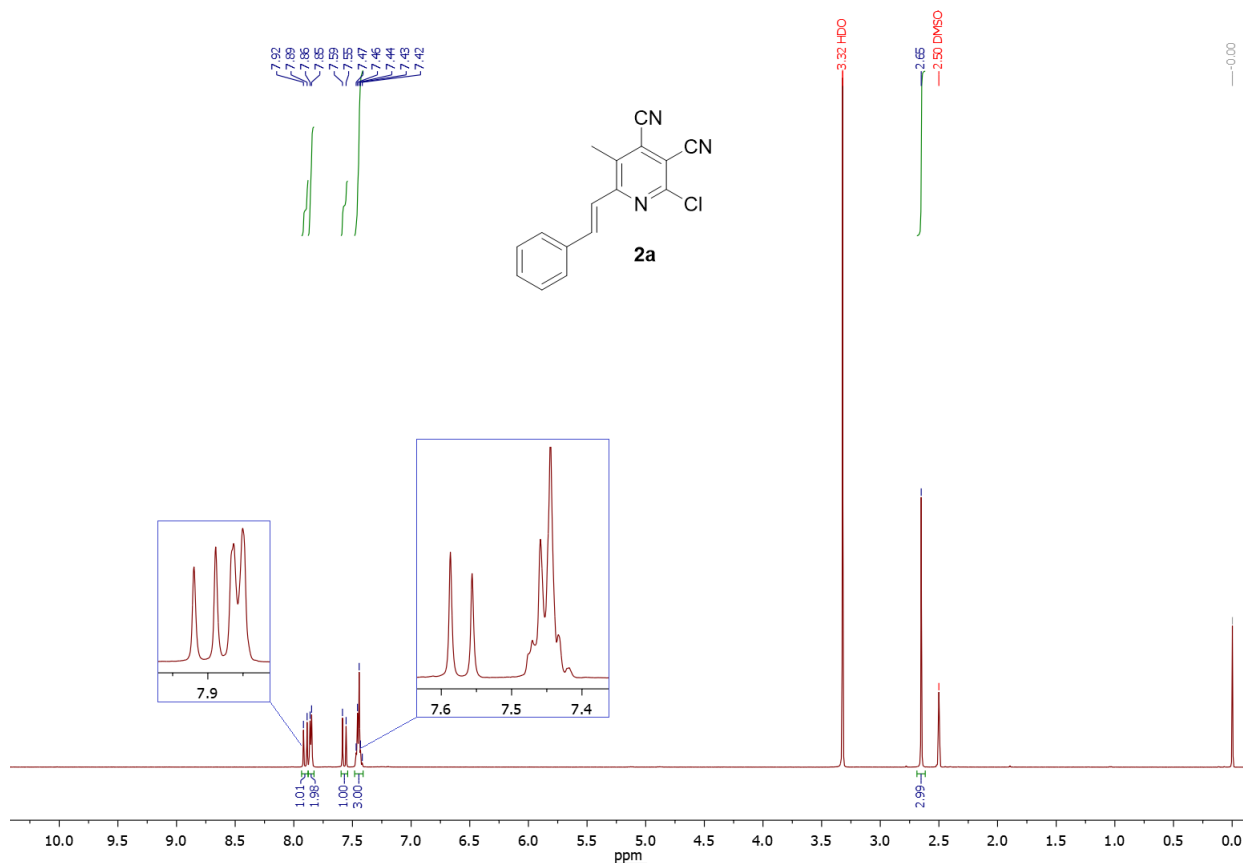

**Figure S1** <sup>1</sup>H NMR-spectrum of **2a** (500 MHz, DMSO-*d*<sub>6</sub>)

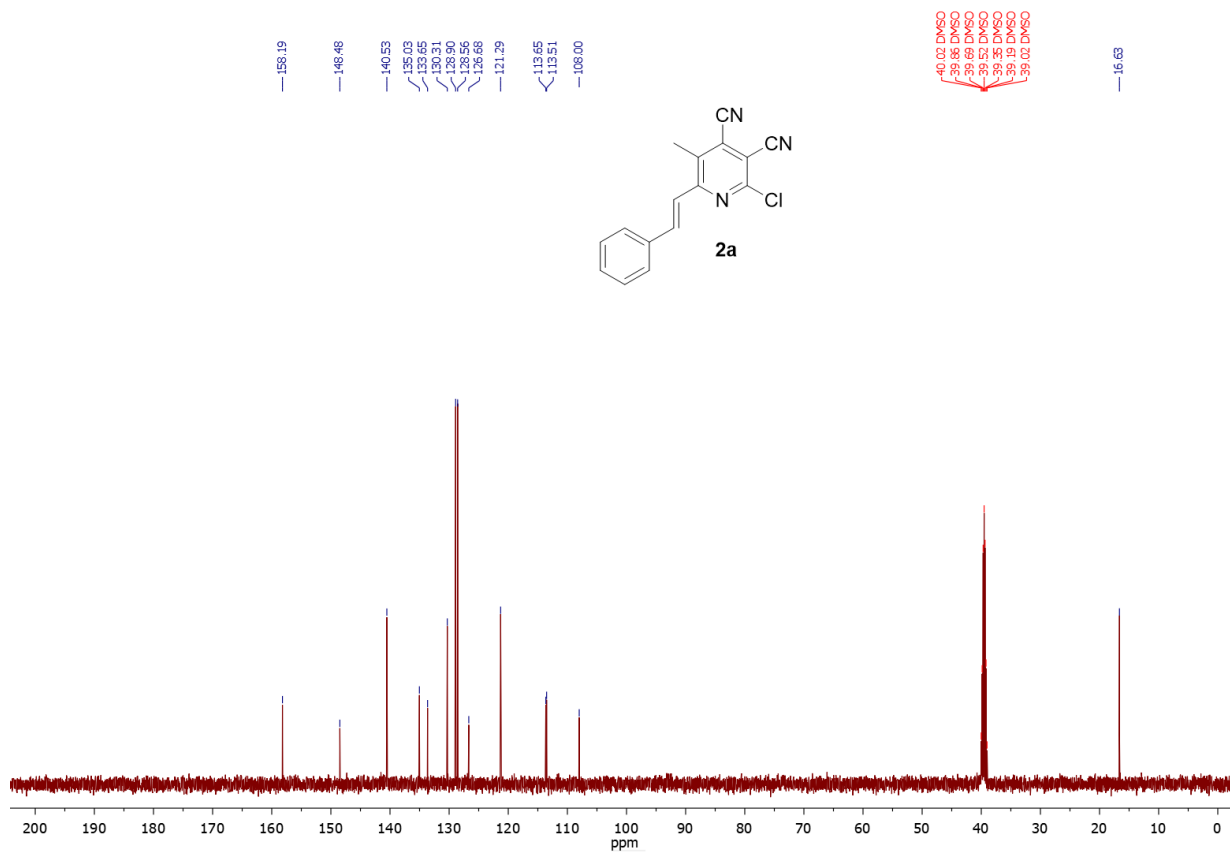

**Figure S2** <sup>13</sup>C NMR-spectrum of **2a** (126 MHz, DMSO-*d*<sub>6</sub>)

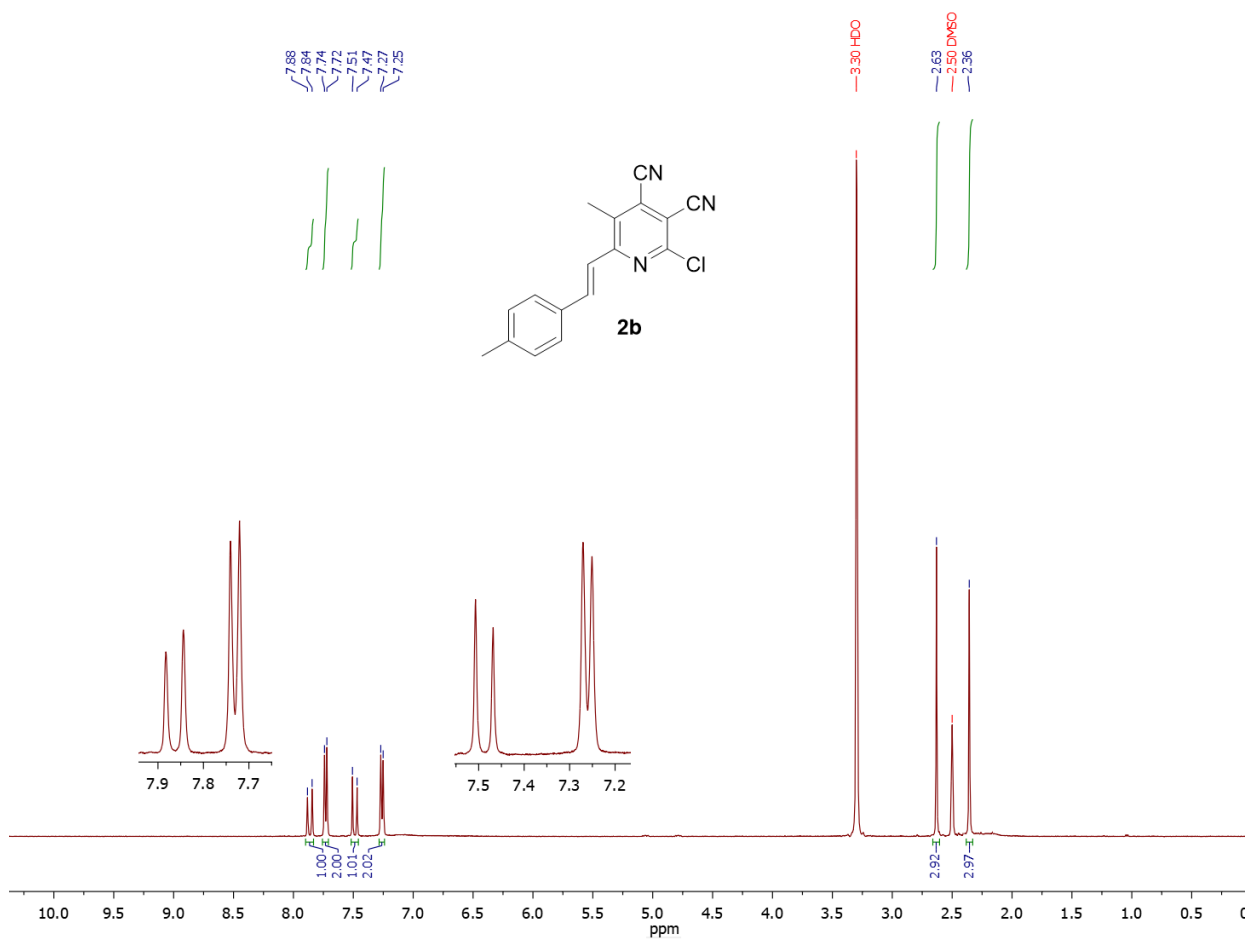

**Figure S3** <sup>1</sup>H NMR-spectrum of **2b** (500 MHz, DMSO-*d*<sub>6</sub>)

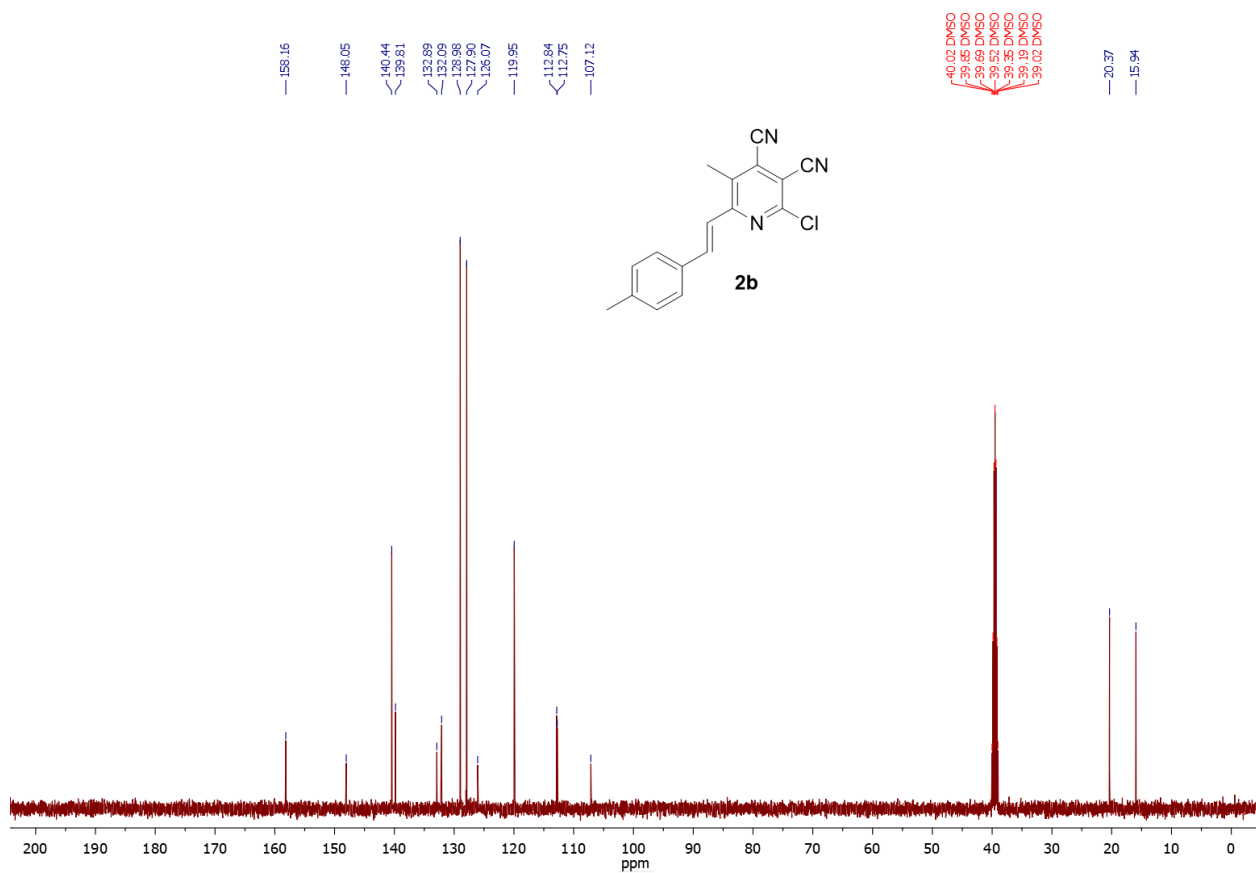

**Figure S4** <sup>13</sup>C NMR-spectrum of **2b** (126 MHz, DMSO-*d*<sub>6</sub>)

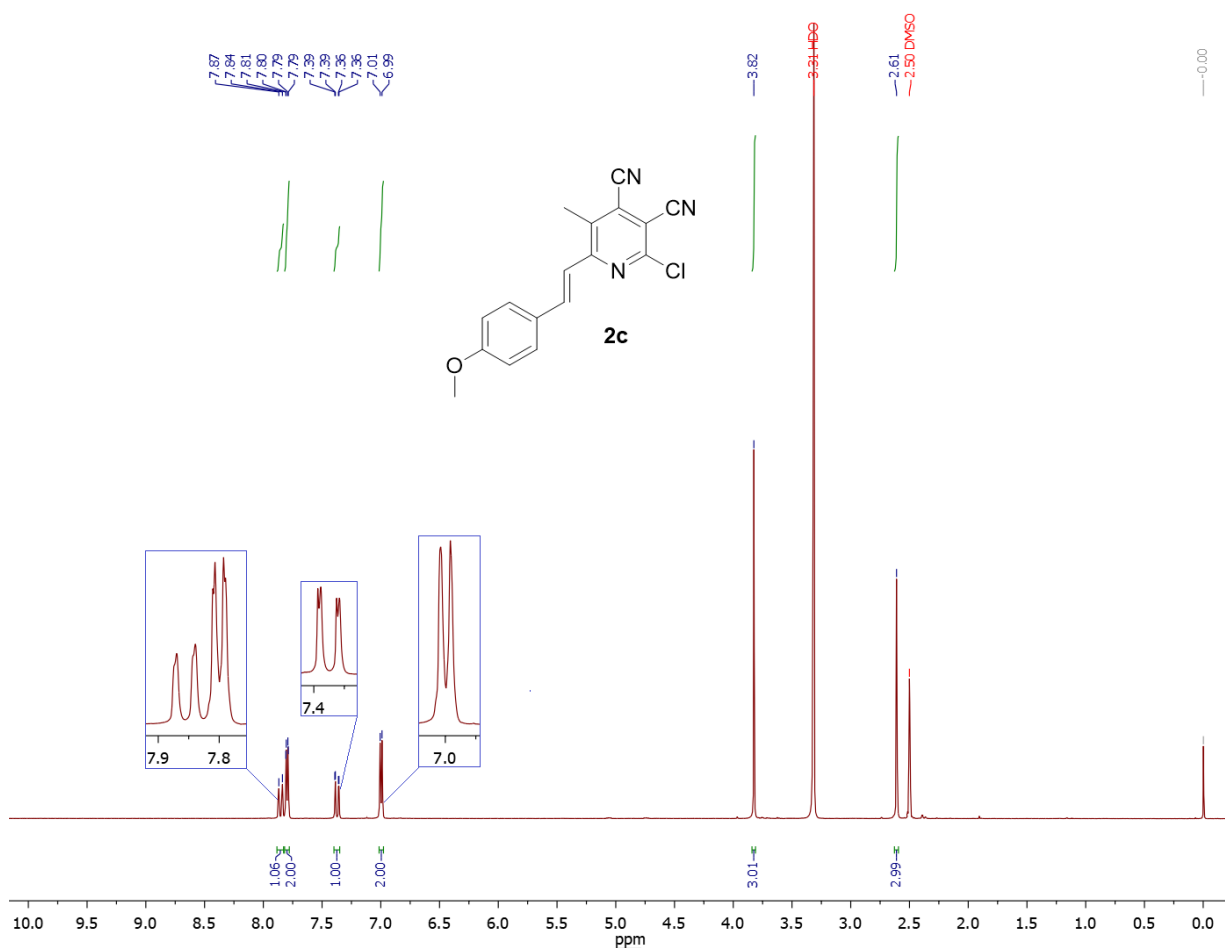

**Figure S5** <sup>1</sup>H NMR-spectrum of **2c** (500 MHz, DMSO-*d*<sub>6</sub>)

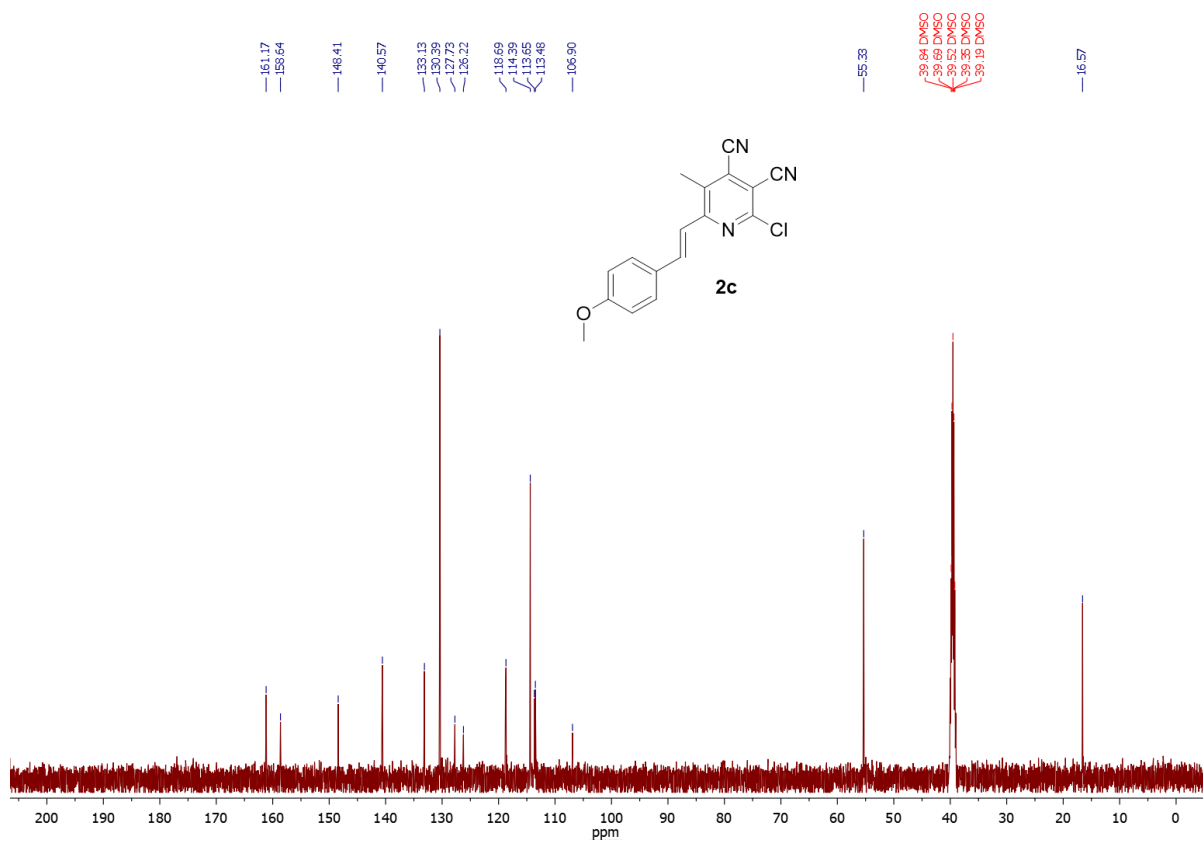

**Figure S6** <sup>13</sup>C NMR-spectrum of **2c** (126 MHz, DMSO-*d*<sub>6</sub>)

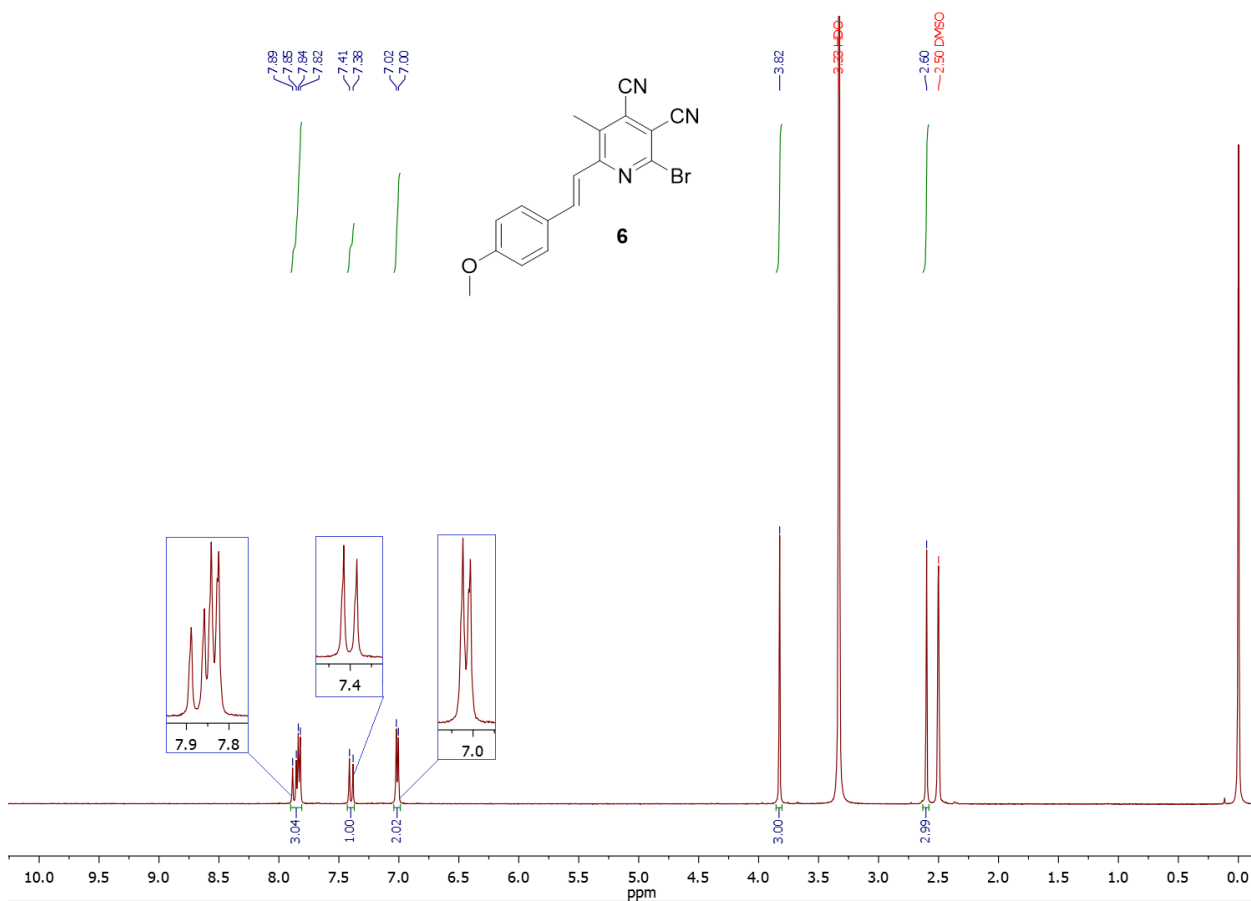

**Figure S7**  $^1\text{H}$  NMR-spectrum of **6** (500 MHz,  $\text{DMSO-}d_6$ )

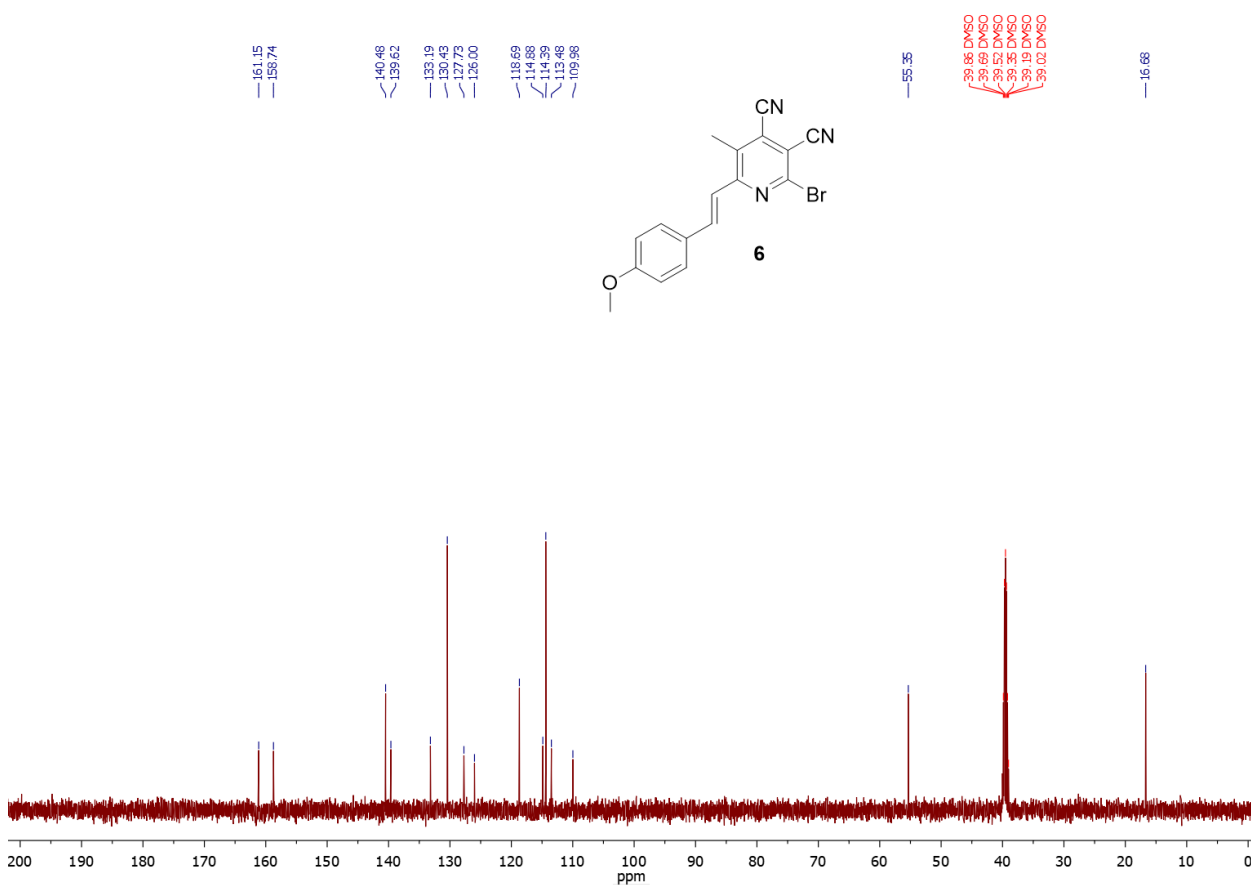

**Figure S8**  $^{13}\text{C}$  NMR-spectrum of **6** (126 MHz,  $\text{DMSO-}d_6$ )

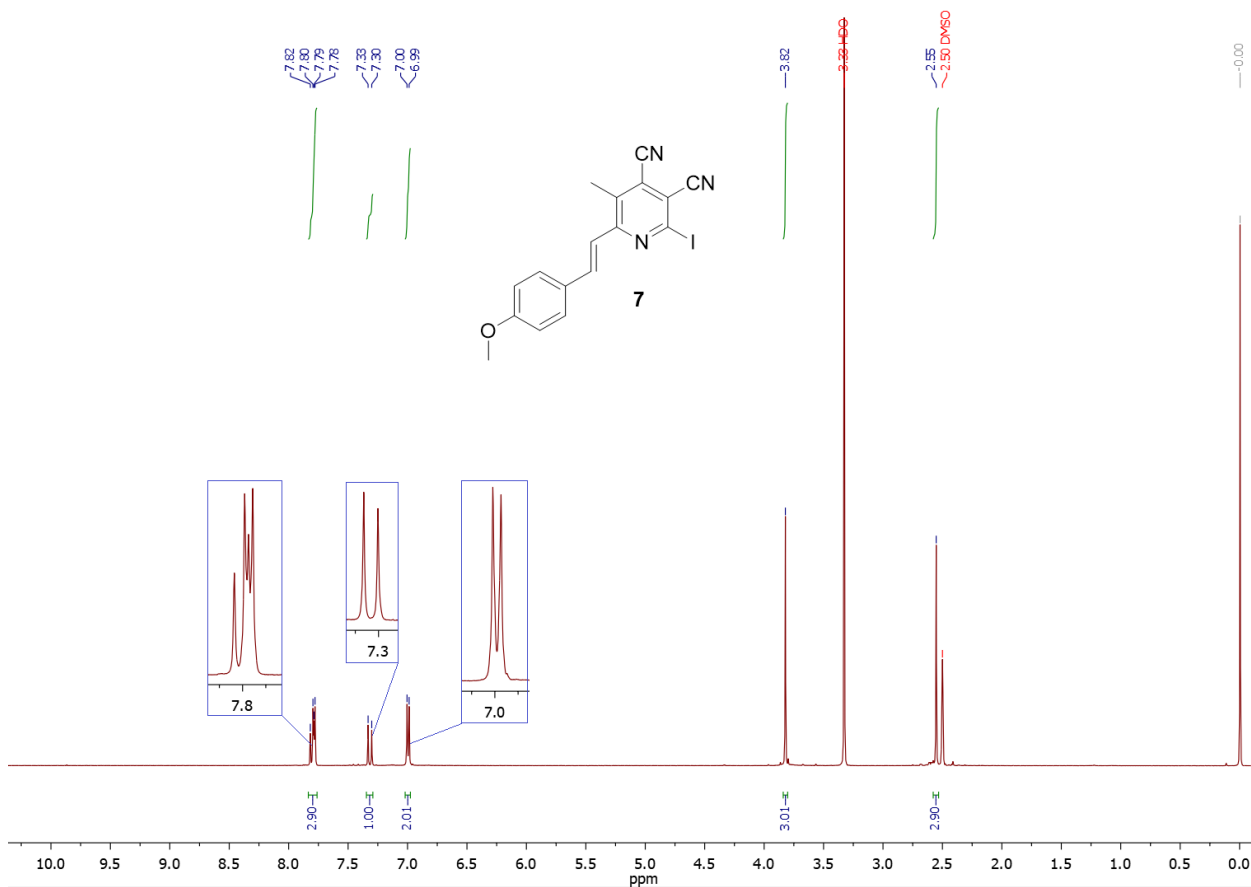

**Figure S9**  $^1\text{H}$  NMR-spectrum of **7** (500 MHz, DMSO- $d_6$ )

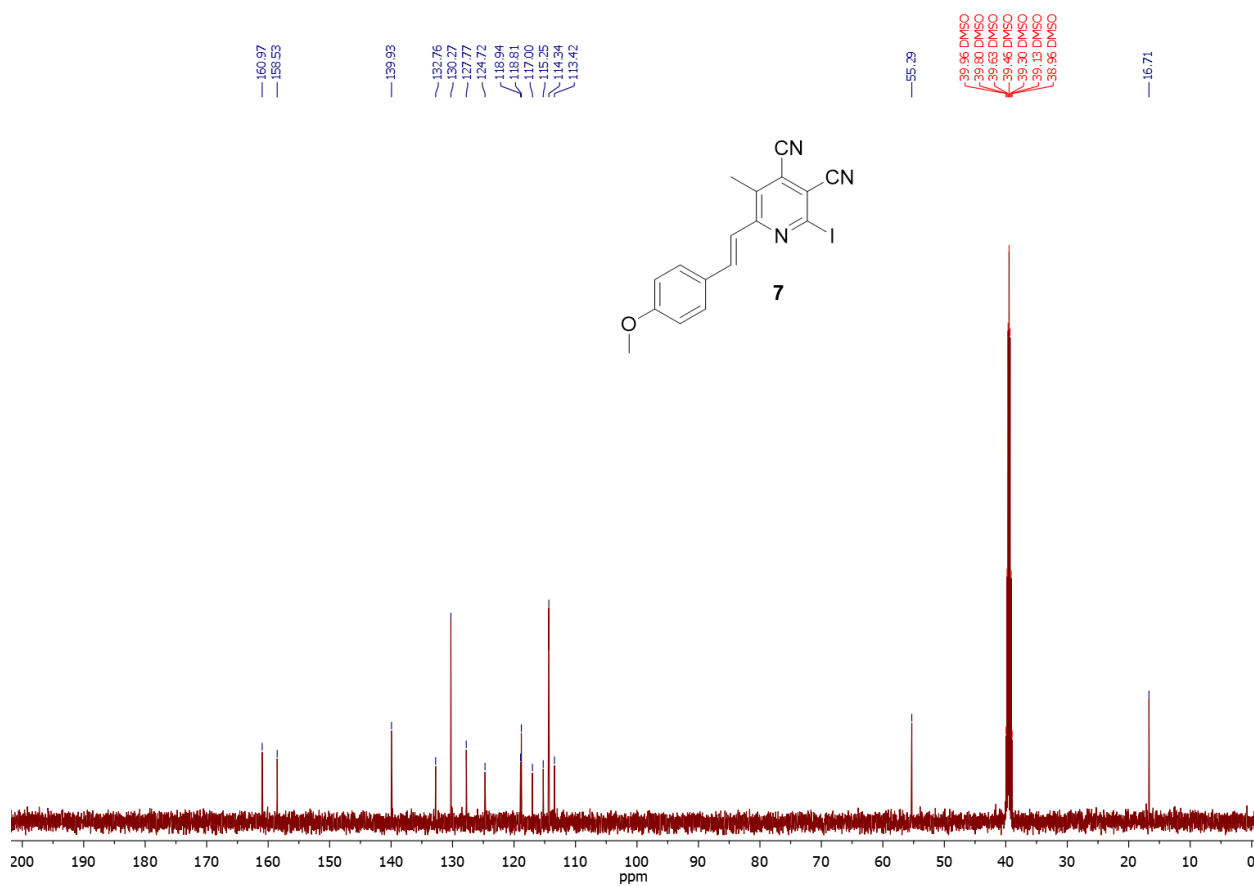

**Figure S10**  $^{13}\text{C}$  NMR-spectrum of **7** (126 MHz, DMSO- $d_6$ )

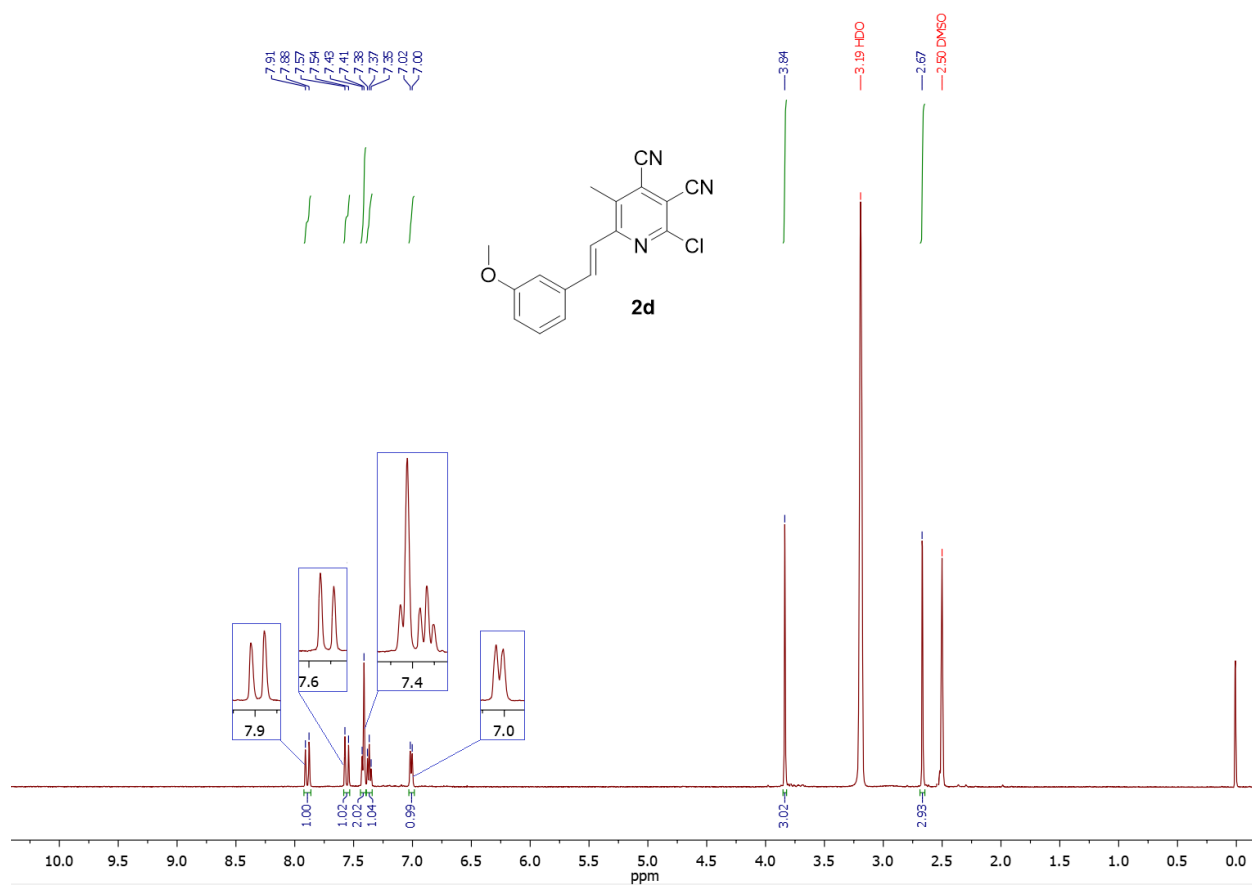

Figure S11 <sup>1</sup>H NMR-spectrum of **2d** (500 MHz, DMSO-*d*<sub>6</sub>)

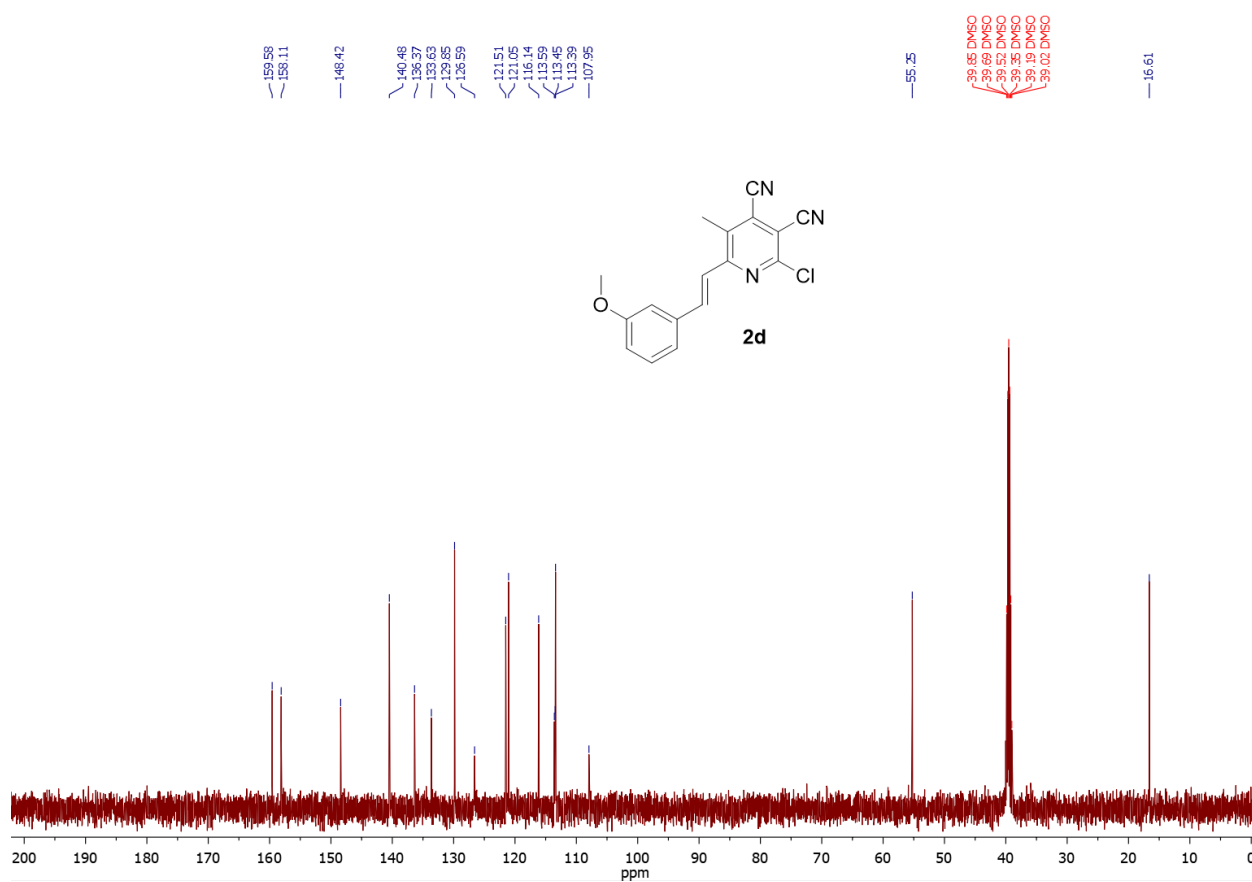

Figure S12 <sup>13</sup>C NMR-spectrum of **2d** (126 MHz, DMSO-*d*<sub>6</sub>)

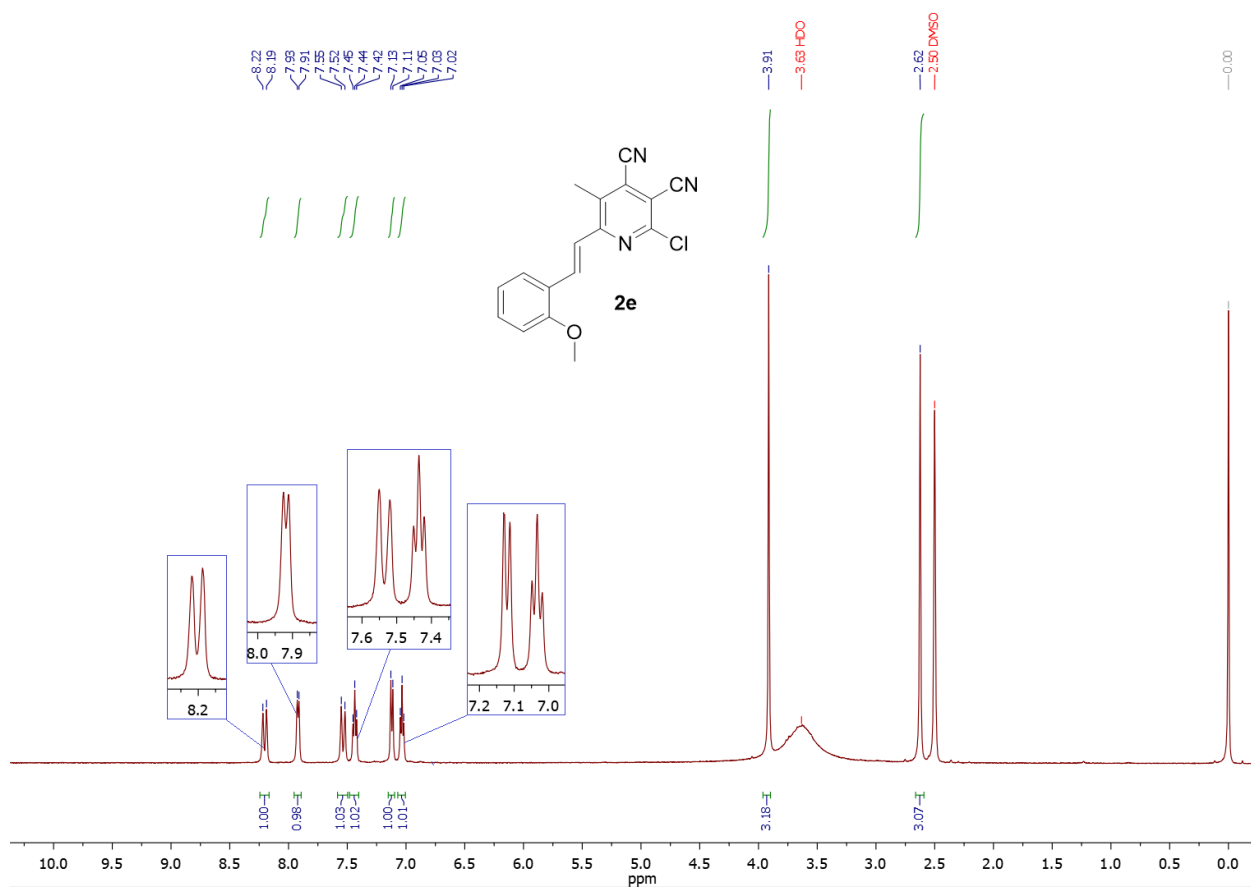

**Figure S13** <sup>1</sup>H NMR-spectrum of **2e** (500 MHz, DMSO-*d*<sub>6</sub>)

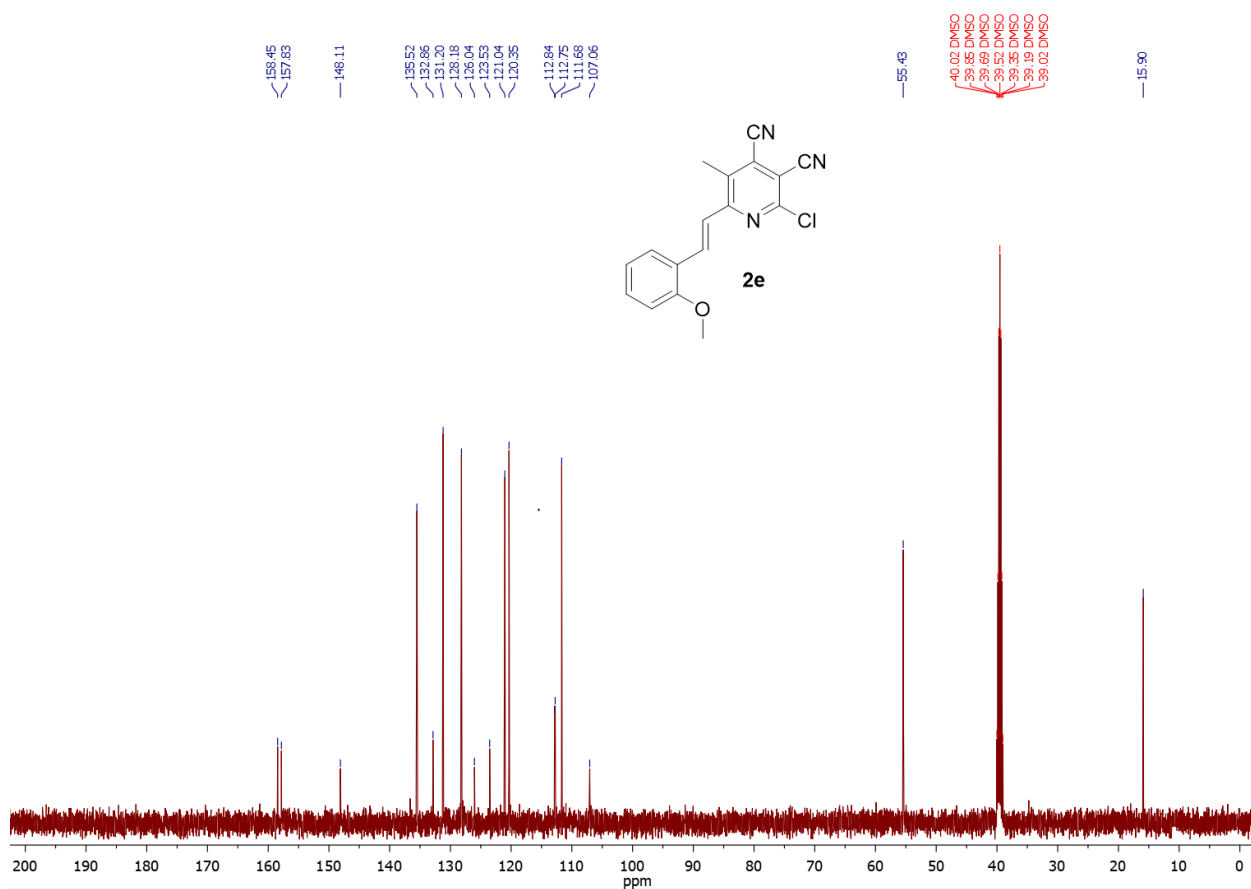

**Figure S14** <sup>13</sup>C NMR-spectrum of **2e** (126 MHz, DMSO-*d*<sub>6</sub>)



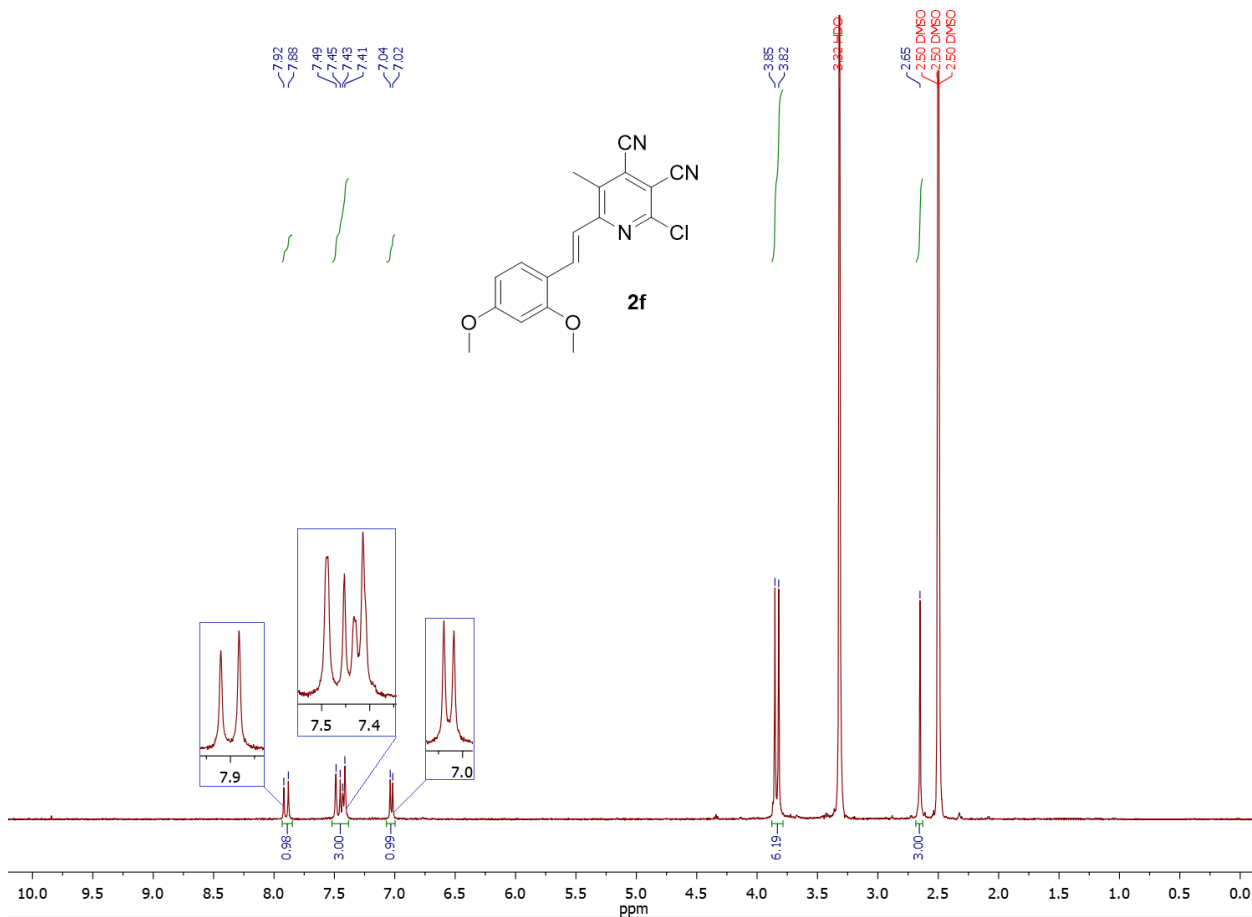

**Figure S15** <sup>1</sup>H NMR-spectrum of **2f** (500 MHz, DMSO-*d*<sub>6</sub>)

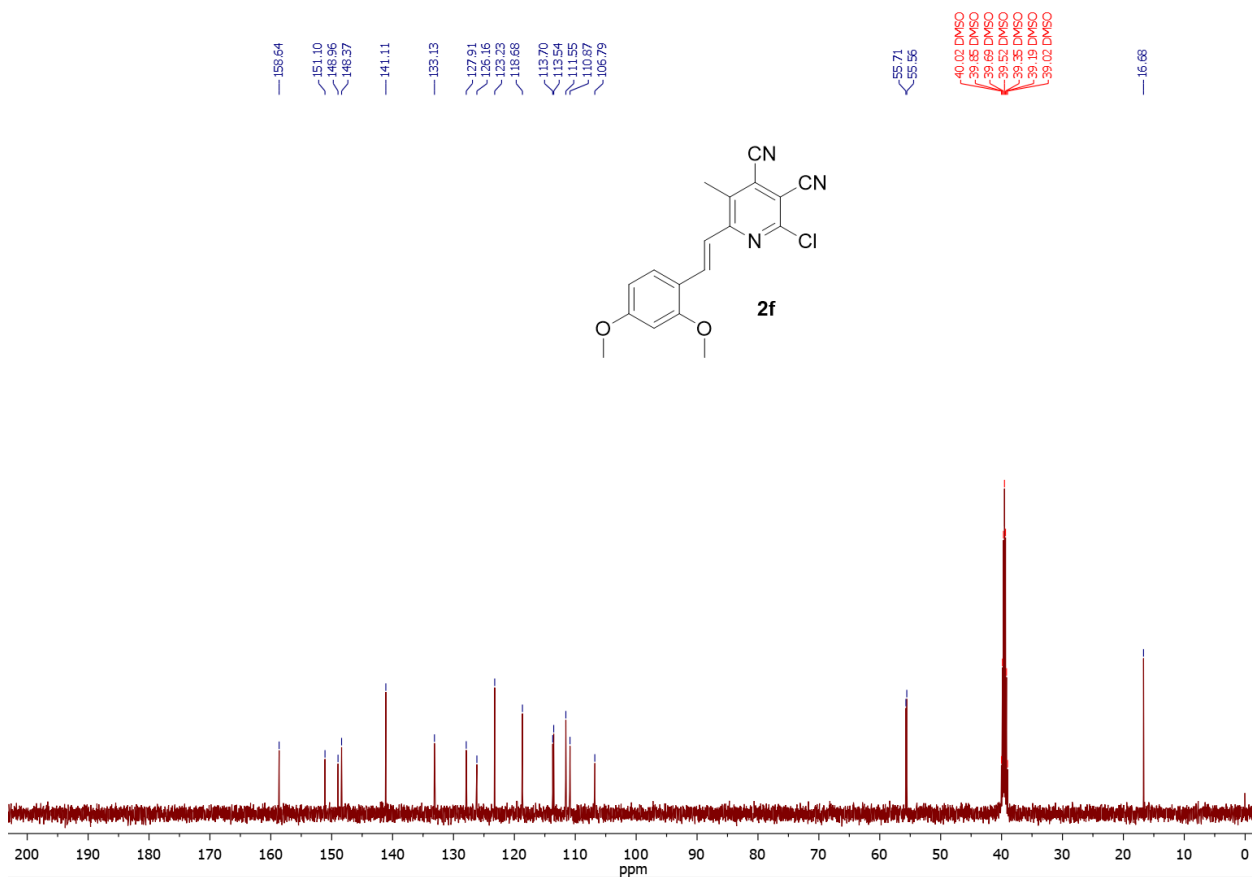

**Figure S16** <sup>13</sup>C NMR-spectrum of **2f** (126 MHz, DMSO-*d*<sub>6</sub>)

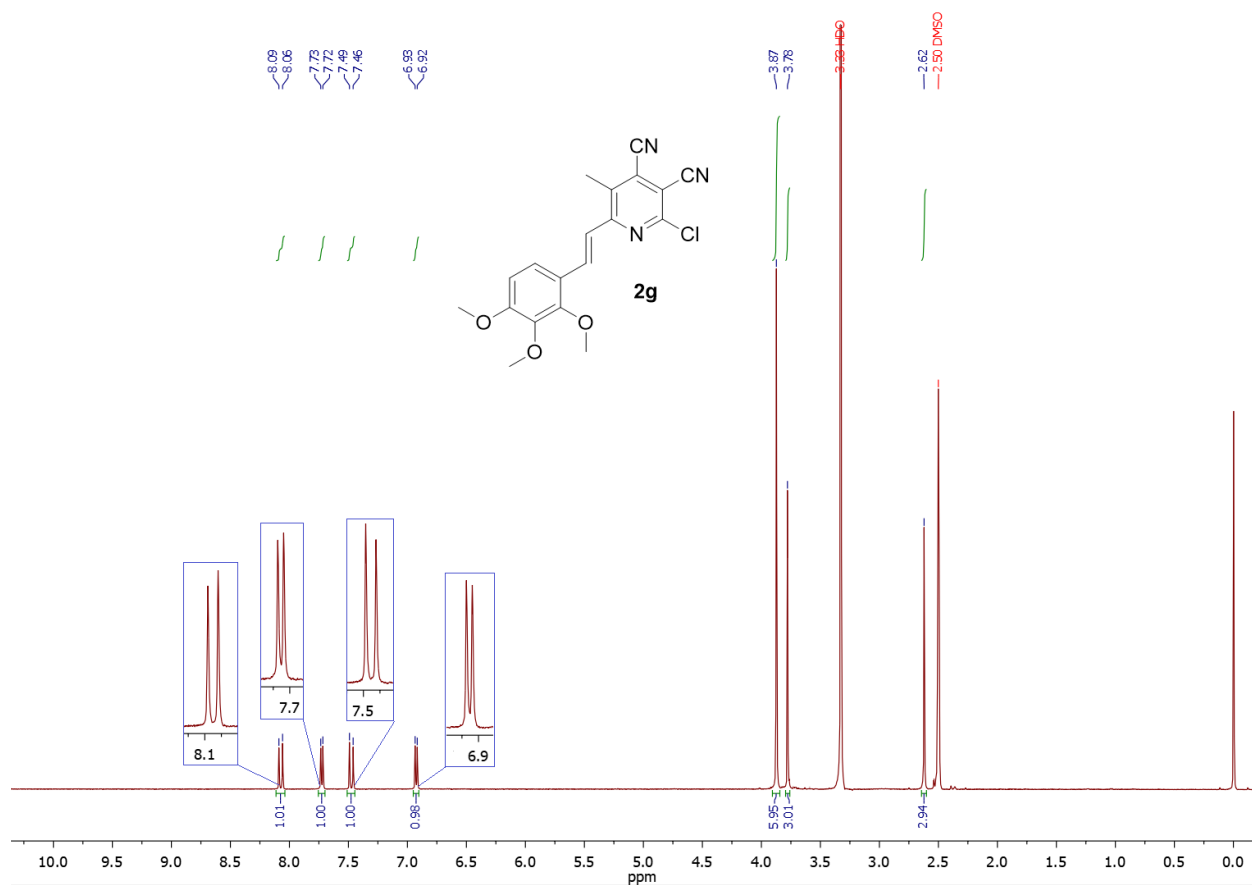

Figure S17 <sup>1</sup>H NMR-spectrum of **2g** (500 MHz, DMSO-*d*<sub>6</sub>)

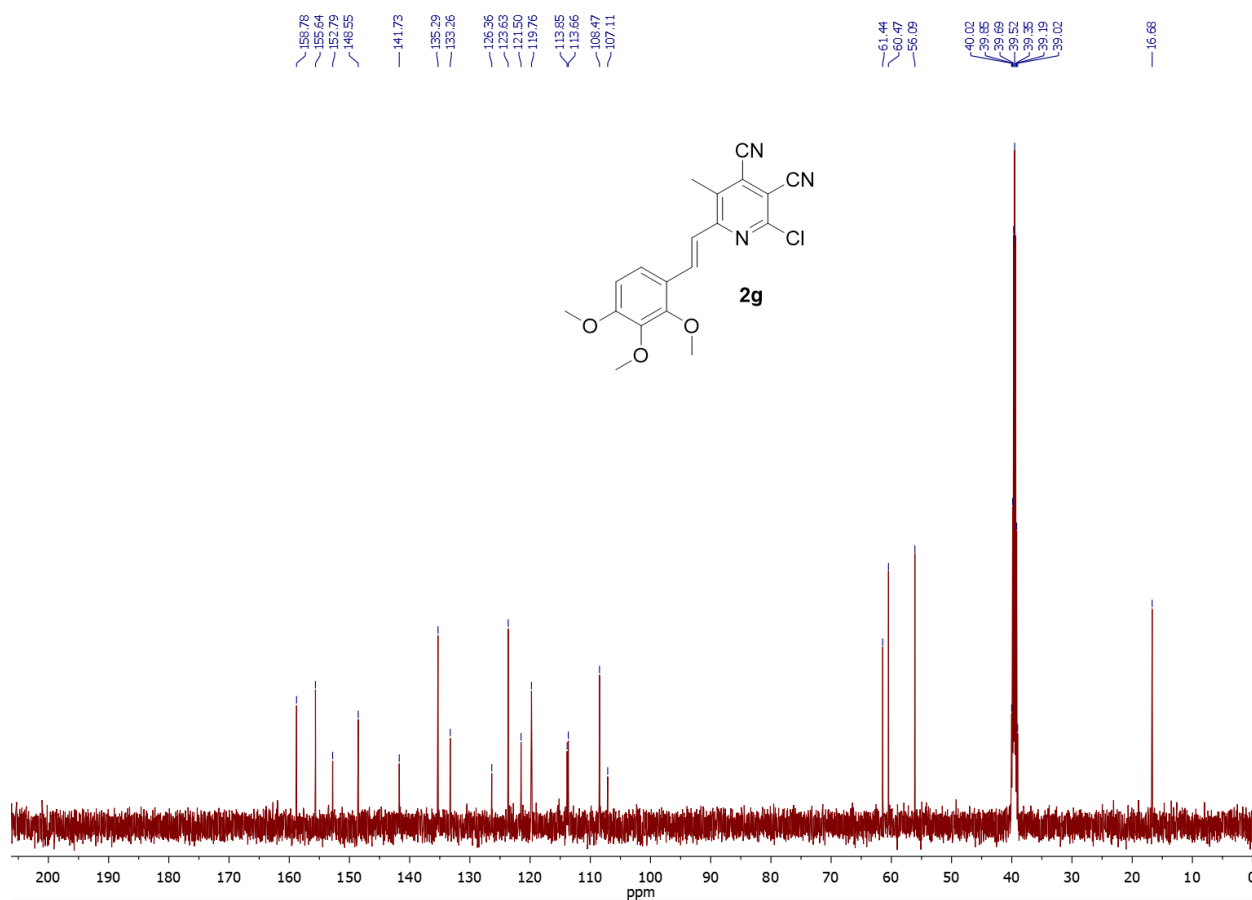

Figure S18 <sup>13</sup>C NMR-spectrum of **2g** (126 MHz, DMSO-*d*<sub>6</sub>)

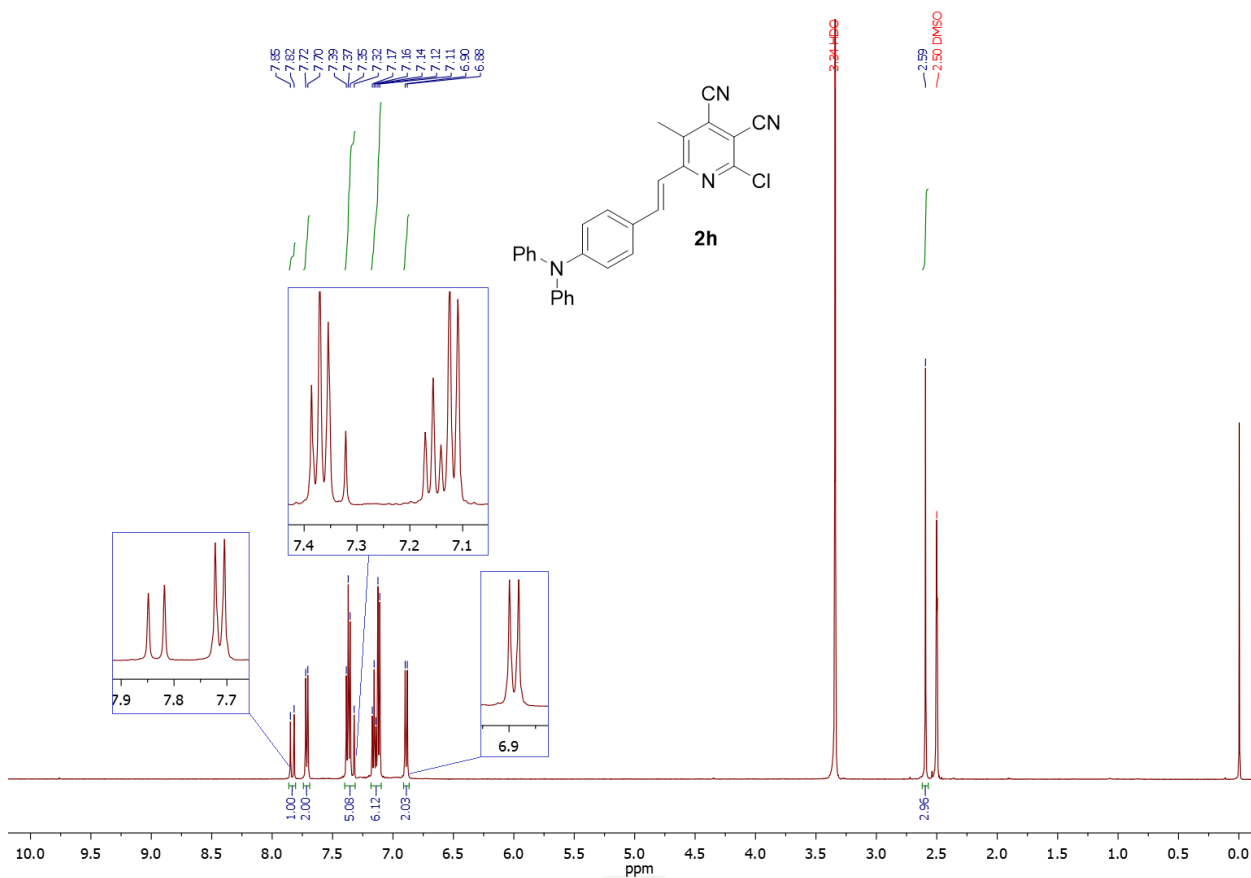

**Figure S19** <sup>1</sup>H NMR-spectrum of **2h** (500 MHz, DMSO-*d*<sub>6</sub>)

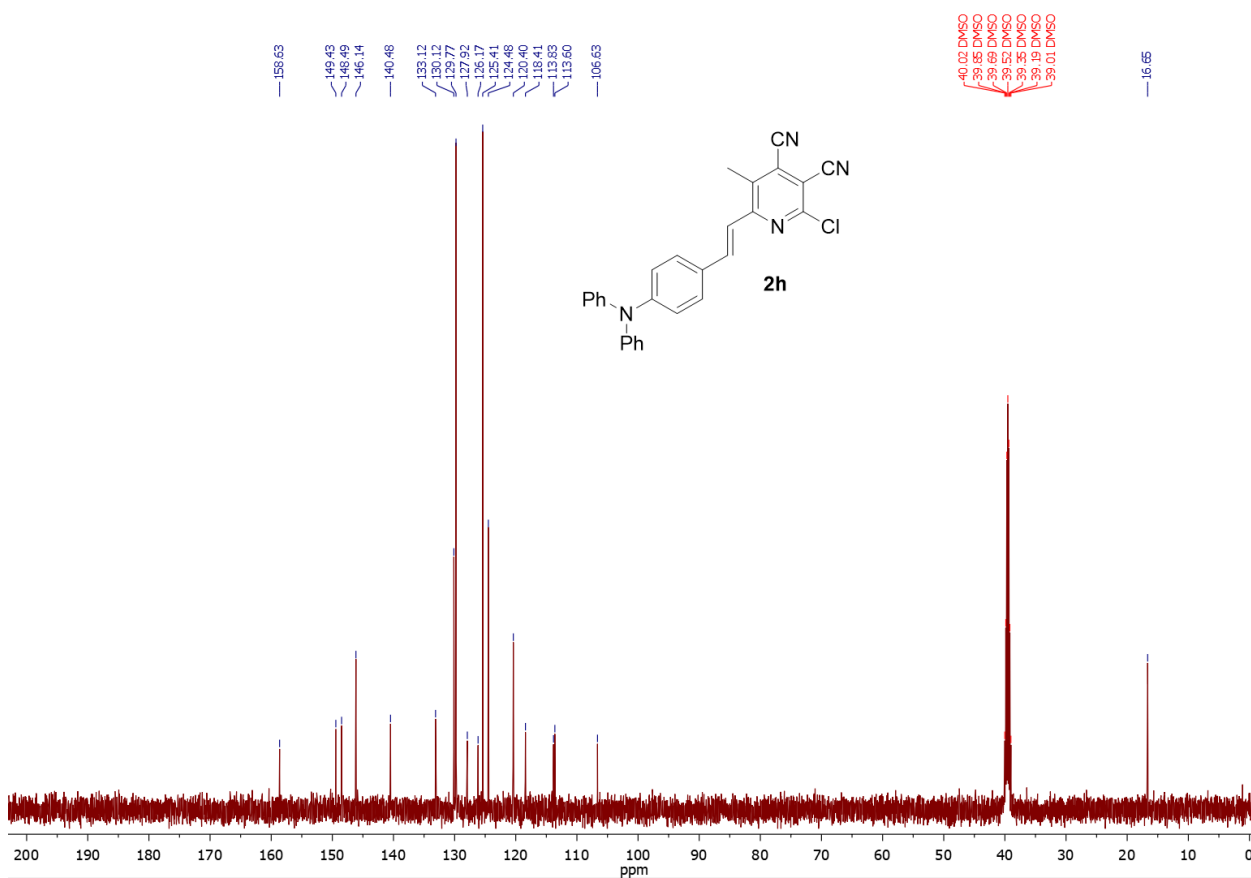

**Figure S20** <sup>13</sup>C NMR-spectrum of **2h** (126 MHz, DMSO-*d*<sub>6</sub>)

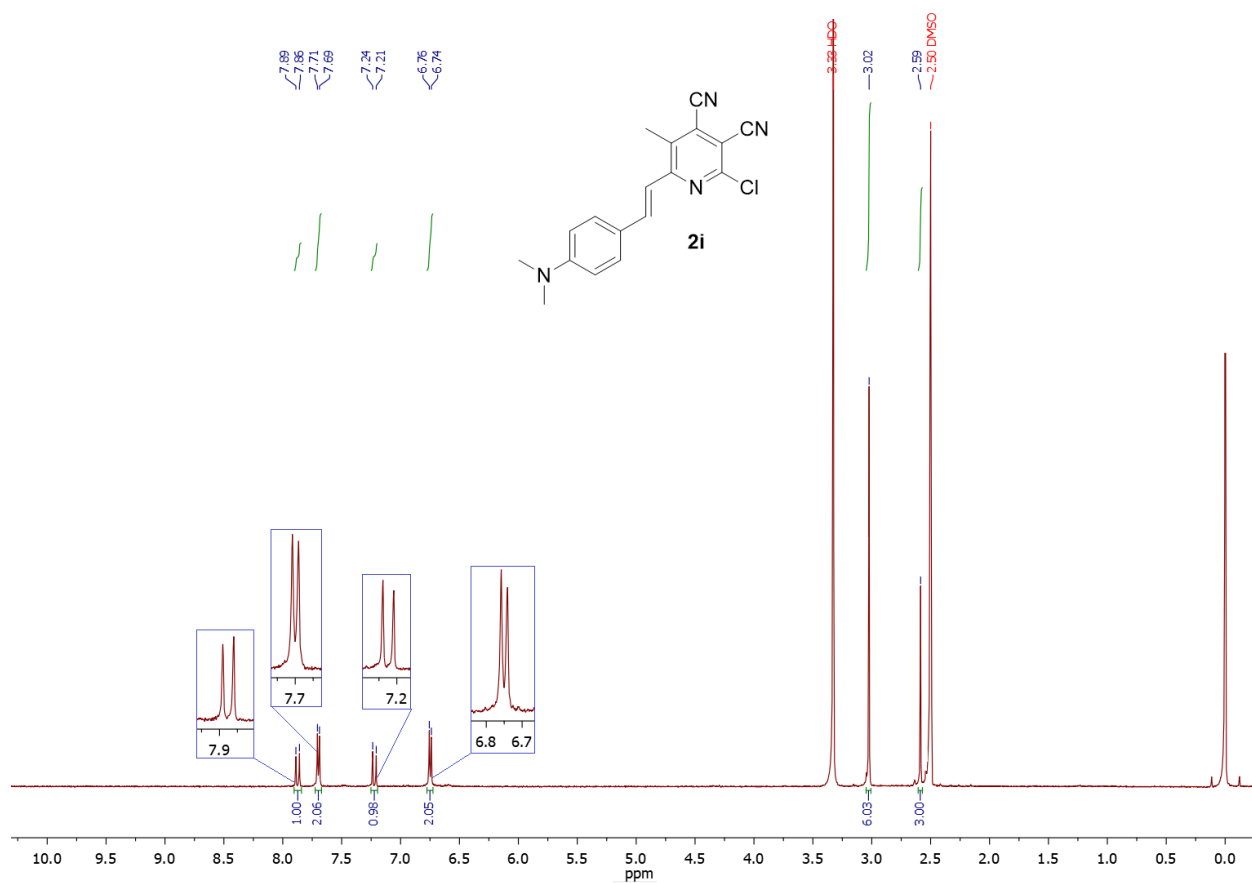

**Figure S21** <sup>1</sup>H NMR-spectrum of **2i** (500 MHz, DMSO-*d*<sub>6</sub>)

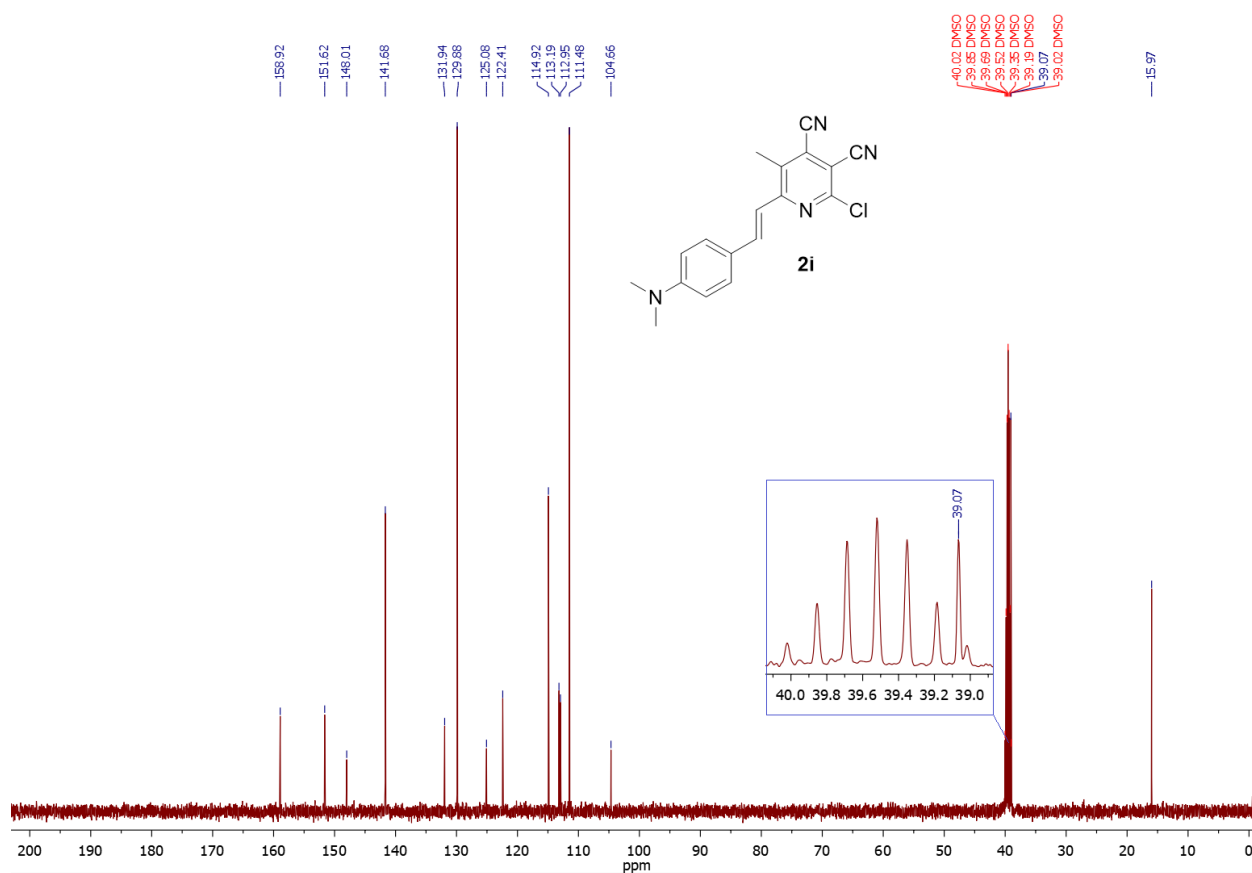

**Figure S22** <sup>13</sup>C NMR-spectrum of **2i** (126 MHz, DMSO-*d*<sub>6</sub>)

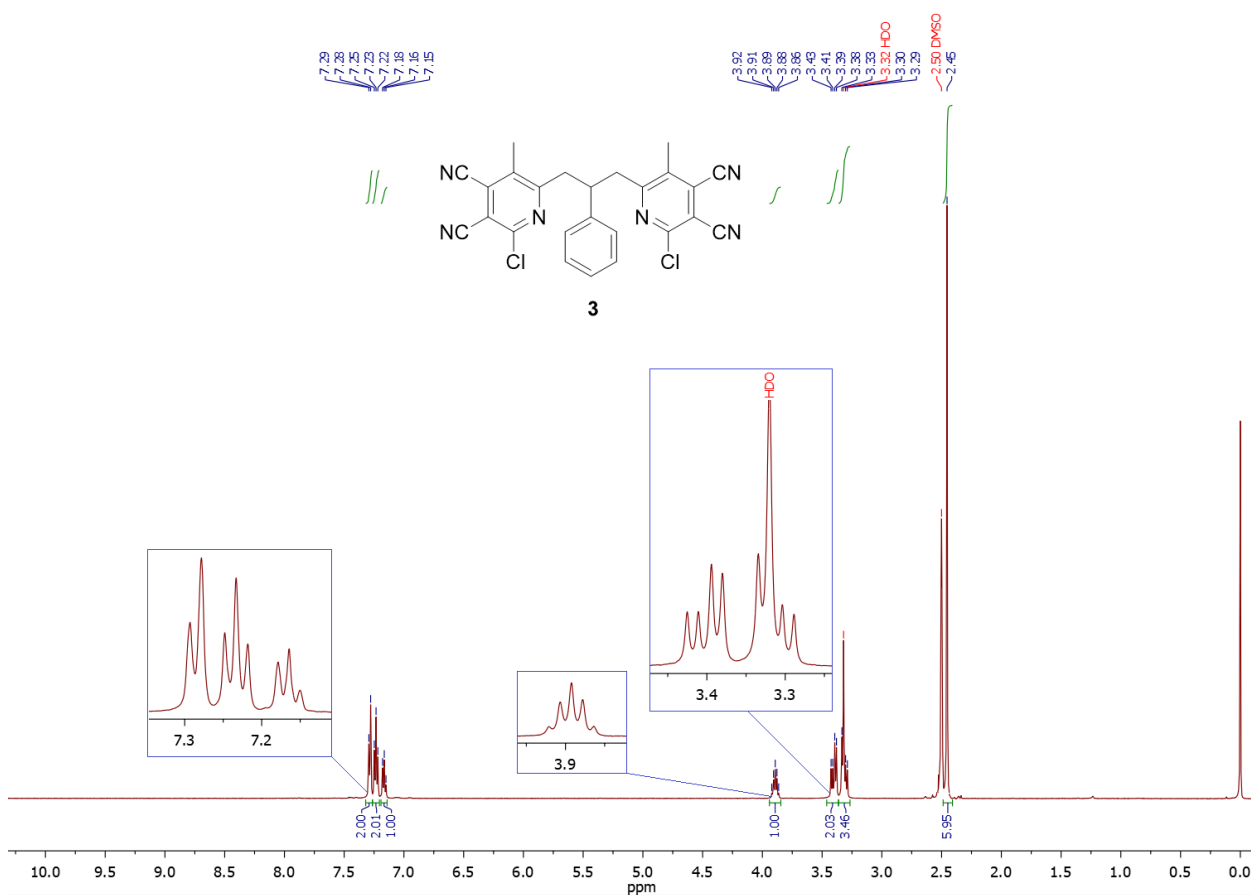

**Figure S23** <sup>1</sup>H NMR-spectrum of **3** (500 MHz, DMSO-*d*<sub>6</sub>)

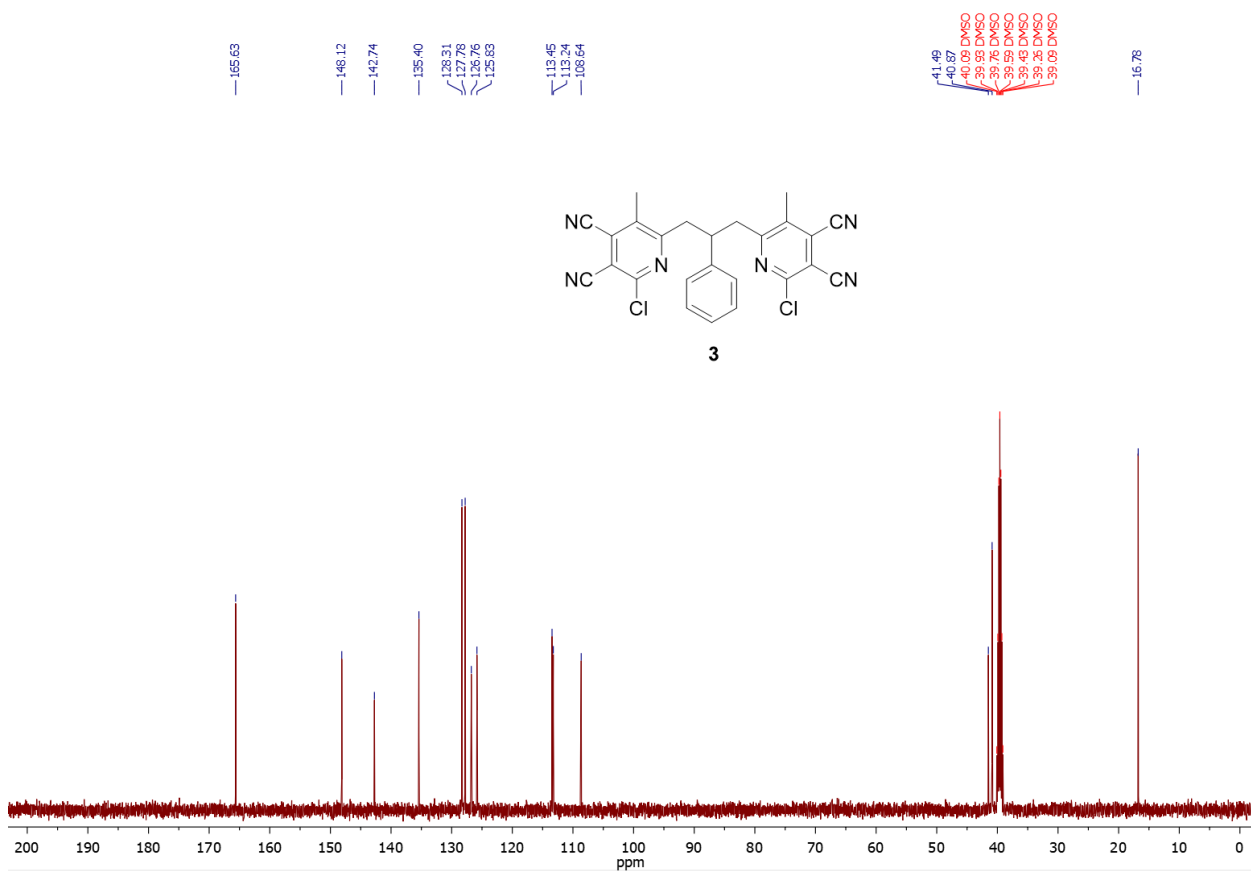

**Figure S24** <sup>13</sup>C NMR-spectrum of **3** (126 MHz, DMSO-*d*<sub>6</sub>)

## 2. Photo-physical characteristics of compounds 2, 6 and 7

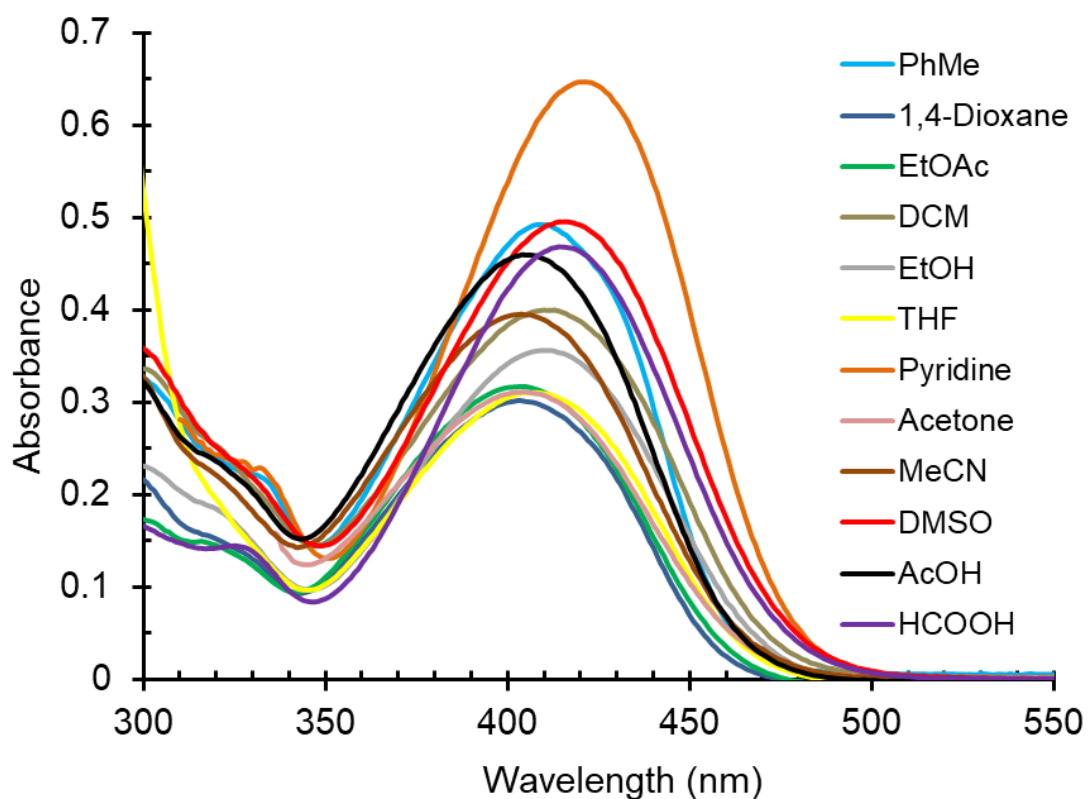

**Figure S25** Absorption spectra of **2c** in various solvents ( $3 \times 10^{-5}$  M)

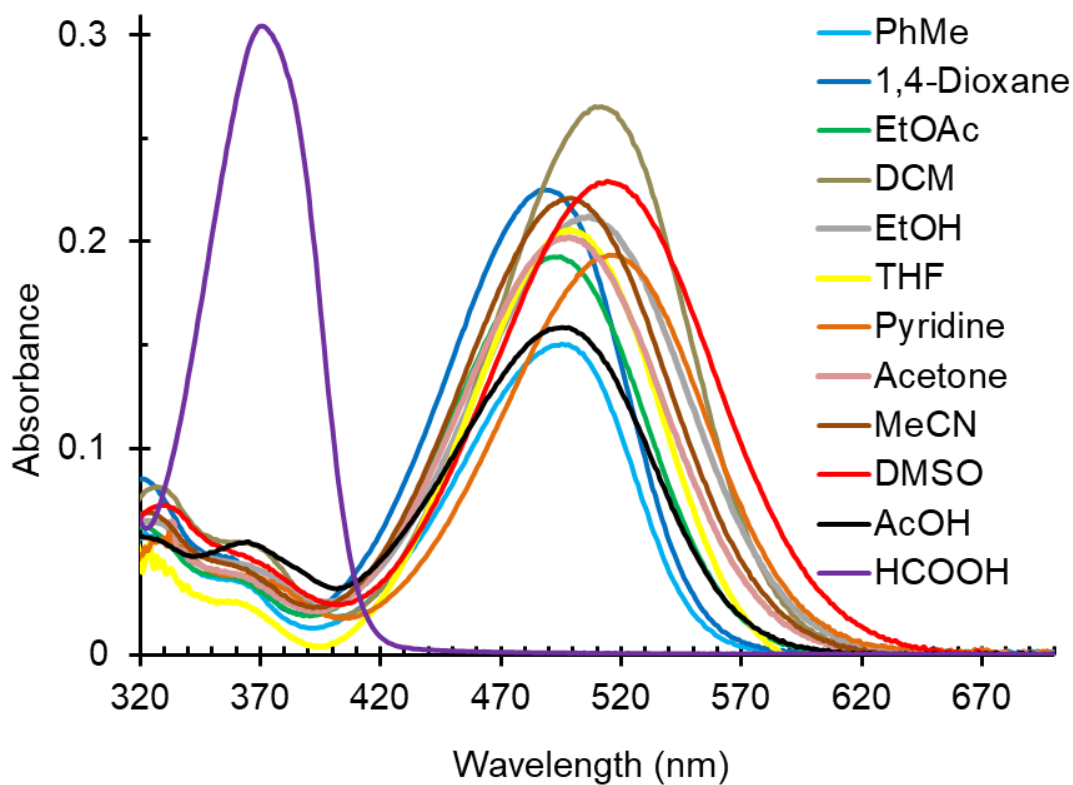

**Figure S26** Absorption spectra of **2i** in various solvents ( $10^{-5}$  M)

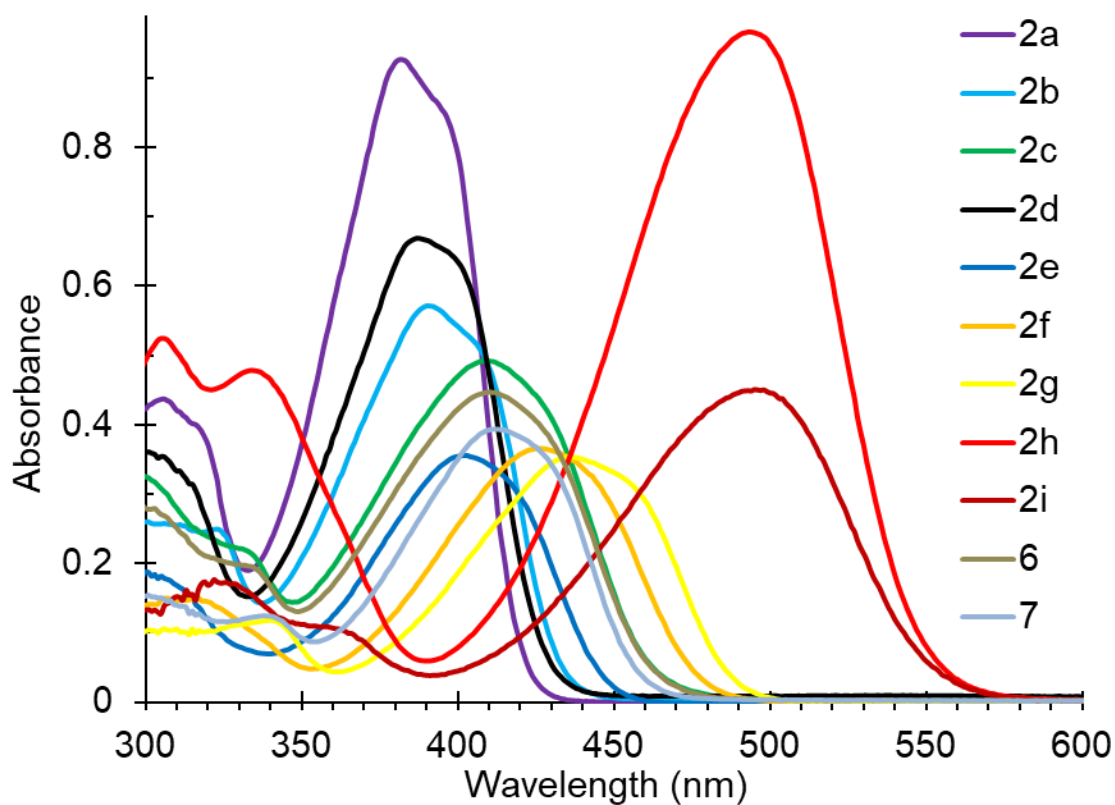

**Figure S27** Absorption spectra of **2**, **6** and **7** in toluene at  $3 \times 10^{-5}$  M

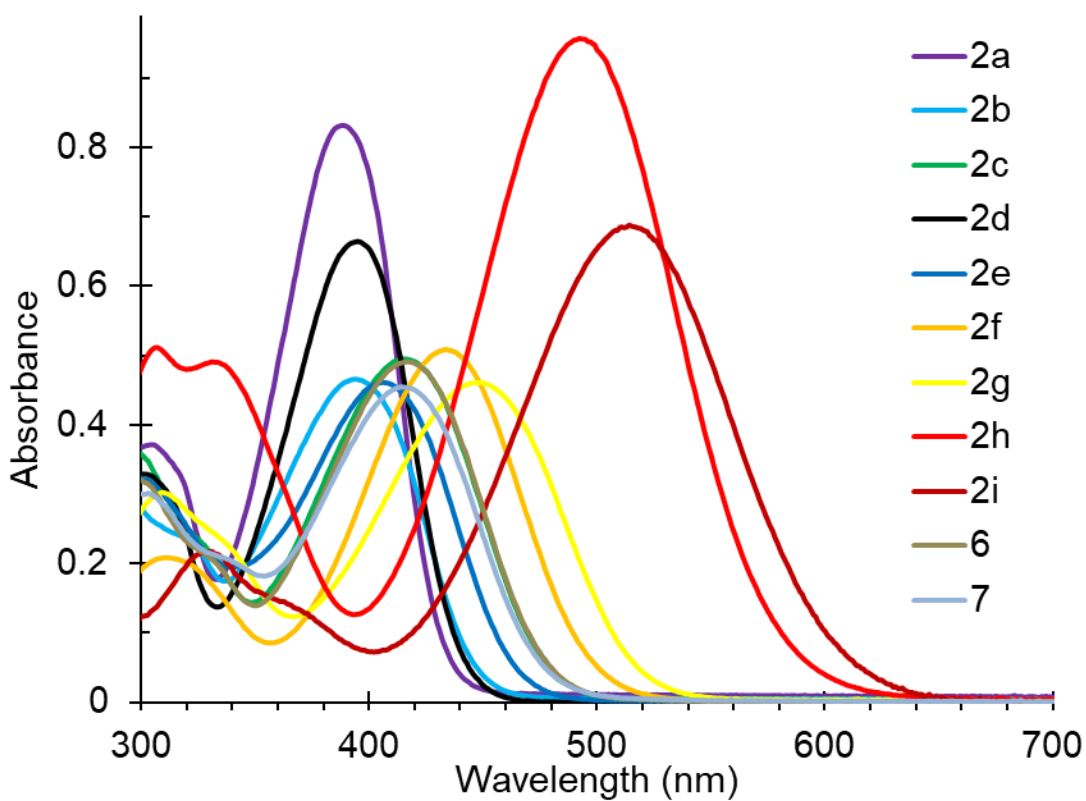

**Figure S28.** Absorption spectra of **2**, **6** and **7** in DMSO at  $3 \times 10^{-5}$  M

**Table S1.** Solvatochromic characteristics of **2c**

| Solvent     | $\lambda_{\text{abs}}$ , nm <sup>[a]</sup> | $\epsilon$ , M <sup>-1</sup> cm <sup>-1</sup> | $\lambda_{\text{em}}$ , nm <sup>[b]</sup> | Stokes shift |                  | $\Phi_{\text{em}}$ , %<br>[c] |
|-------------|--------------------------------------------|-----------------------------------------------|-------------------------------------------|--------------|------------------|-------------------------------|
|             |                                            |                                               |                                           | nm           | cm <sup>-1</sup> |                               |
| PhMe        | 409                                        | 16400                                         | 482                                       | 73           | 3703             | 3.9                           |
| 1,4-Dioxane | 403                                        | 10100                                         | 493                                       | 90           | 4530             | 3.0                           |
| DCM         | 410                                        | 13300                                         | 523                                       | 113          | 5270             | 3.2                           |
| THF         | 408                                        | 10300                                         | 517                                       | 109          | 5167             | 4.5                           |
| EtOAc       | 404                                        | 10600                                         | 515                                       | 111          | 5335             | 3.8                           |
| AcOH        | 404                                        | 15300                                         | 529                                       | 125          | 5849             | 4.3                           |
| HCOOH       | 414                                        | 15600                                         | 565                                       | 151          | 6455             | 4.4                           |
| EtOH        | 411                                        | 11900                                         | 546                                       | 135          | 6016             | 6.1                           |
| Pyridine    | 420                                        | 21600                                         | 545                                       | 125          | 5461             | 13.6                          |
| Acetone     | 405                                        | 10400                                         | 541                                       | 136          | 6207             | 6.2                           |
| MeCN        | 403                                        | 13200                                         | 549                                       | 146          | 6599             | 7.7                           |
| DMSO        | 416                                        | 16500                                         | 562                                       | 146          | 6245             | 14.1                          |

<sup>[a]</sup> Absorption maxima of solutions with concentration of  $3 \times 10^{-5}$  M

<sup>[b]</sup> Emission maxima of solutions with concentration of  $3 \times 10^{-5}$  M (absorption maxima were used for excitation)

<sup>[c]</sup> The relative emission quantum yield ( $\Phi_{\text{em}}$ ) was measured using 7-hydroxy-4-methylcoumarin in phosphate buffer with pH 10 ( $\Phi_{\text{em}}$  0.7) using 330 nm as excitation wavelength.



**Table S2.** Photo-physical characteristics of **2a-i**, **6** and **7** in DMSO

| Compound  | $\lambda_{\text{abs}}$ , nm <sup>[a]</sup> | $\epsilon$ , M <sup>-1</sup> cm <sup>-1</sup> | $\lambda_{\text{em}}$ , nm <sup>[b]</sup> | Stokes shift |                  | $\Phi_{\text{em}}$ , % |
|-----------|--------------------------------------------|-----------------------------------------------|-------------------------------------------|--------------|------------------|------------------------|
|           |                                            |                                               |                                           | nm           | cm <sup>-1</sup> |                        |
| <b>2a</b> | 388                                        | 27700                                         | 488                                       | 100          | 5281             | 1.2 <sup>[c]</sup>     |
| <b>2b</b> | 394                                        | 15500                                         | 510                                       | 116          | 5773             | 4.4 <sup>[c]</sup>     |
| <b>2c</b> | 416                                        | 16500                                         | 562                                       | 146          | 6245             | 14.1 <sup>[c]</sup>    |
| <b>6</b>  | 417                                        | 16400                                         | 563                                       | 146          | 6219             | 17.7 <sup>[c]</sup>    |
| <b>7</b>  | 414                                        | 15200                                         | 563                                       | 149          | 6393             | 13.8 <sup>[c]</sup>    |
| <b>2d</b> | 395                                        | 22200                                         | 563                                       | 168          | 7554             | 9.8 <sup>[c]</sup>     |
| <b>2e</b> | 406                                        | 15400                                         | 558                                       | 152          | 6709             | 0.7 <sup>[c]</sup>     |
| <b>2f</b> | 434                                        | 16900                                         | 611                                       | 177          | 6675             | 2.3 <sup>[d]</sup>     |
| <b>2g</b> | 447                                        | 15400                                         | 587                                       | 140          | 5336             | 6.0 <sup>[d]</sup>     |
| <b>2h</b> | 492                                        | 31900                                         | 655, 697                                  | 163, 205     | 5058, 5978       | 0.2 <sup>[d]</sup>     |
| <b>2i</b> | 515                                        | 22900                                         | 710                                       | 196          | 5371             | 0.2 <sup>[d]</sup>     |

<sup>[a]</sup> Absorption maxima of solutions with concentration of  $3 \times 10^{-5}$  M

<sup>[b]</sup> Emission maxima of solutions with concentration of  $3 \times 10^{-5}$  M (absorption maxima were used for excitation)

<sup>[c]</sup> The relative emission quantum yield ( $\Phi_{\text{em}}$ ) was measured using 7-hydroxy-4-methylcoumarin in phosphate buffer with pH 10 ( $\Phi_{\text{em}}$  0.7) using 330 nm as excitation wavelength

<sup>[d]</sup> The relative emission quantum yield ( $\Phi_{\text{em}}$ ) was measured using Rhodamine 6G in ethanol ( $\Phi_{\text{em}}$  0.95) using 450 nm as excitation wavelength.

### 3. Calculation of charge-transfer properties of compounds **2c** and **2i**

The change in the dipole moment  $\Delta\mu$  (in Debyes) upon transition between the ground and excited states for compounds **2c** and **2i** was estimated using the Lippert–Mataga equation:

$$\Delta\nu = \nu_{abs} - \nu_{em} = f(\varepsilon_r, n) \frac{2(\Delta\mu)^2}{hc a^3} + const$$

where  $\Delta\nu$  is the Stokes shift value found as the difference between absorption ( $\nu_{abs}$ ) and emission ( $\nu_{em}$ ) maxima wavenumbers (in  $\text{cm}^{-1}$ ) in corresponding solvent;  $h$  is Planck's constant ( $6.6262 \times 10^{-27}$  erg $\times$ s);  $c$  is the speed of light in vacuum ( $2.9979 \times 10^{10}$  cm/s);  $a$  is the cavity radius (in Å) in which the solute resides estimated from the van der Waals volume ( $V_{VDW} = \frac{4}{3}\pi a^3$ ) of the fluorophore molecule;  $f(\varepsilon_r, n)$  is the orientation polarizability (Lippert-Mataga polarity function) of the solvent defined as:

$$f(\varepsilon_r, n) = \frac{\varepsilon_r - 1}{2\varepsilon_r + 1} - \frac{n^2 - 1}{n^2 + 1}$$

where  $\varepsilon_r$  is the static dielectric constant and  $n$  is the optical refractivity index of the solvent (Table S4).

The van der Waals volumes ( $V_{VDW}$ ) of molecule **2c** and **2i** were calculated by the following reported formula<sup>[1]</sup>:

$$V_{VDW} = \sum (\text{all atom contributions}) - 5.92N_B - 14.7R_A - 3.8R_{NA}$$

where  $N_B = (\text{Number of atoms} - 1 + R_A + R_{NA})$ ;  $R_A$  is the number of aromatic rings;  $R_{NA}$  is the number of non-aromatic rings; and  $V_{vdw}$  for C = 20.58 Å<sup>3</sup>; for H = 7.24 Å<sup>3</sup>; for O = 14.71 Å<sup>3</sup>; for N = 15.60 Å<sup>3</sup>; for Cl = 22.45 Å<sup>3</sup>

**Table S3.** Calculated Van Der Waals Volume ( $V_{VDW}$ ) and cavity radius ( $a$ ).

| Dye       | Molecular Formula                                  | $\sum(\text{all atom contributions})$ | $N_B$ | Vvdw (Å <sup>3</sup> ) | $a$ (Å) |
|-----------|----------------------------------------------------|---------------------------------------|-------|------------------------|---------|
| <b>2c</b> | C <sub>17</sub> H <sub>12</sub> ClN <sub>3</sub> O | 520.7                                 | 35    | 284.1                  | 4.1     |
| <b>2i</b> | C <sub>18</sub> H <sub>15</sub> ClN <sub>4</sub>   | 563.8                                 | 39    | 303.6                  | 4.2     |

<sup>[1]</sup>Y. H. Zhao, M. H. Abraham, and A.M. Zissimos, Fast Calculation of van der Waals Volume as a Sum of Atomic and Bond Contributions and Its Application to Drug Compounds *J. Org. Chem.* 2003, 68, 7368-7373  
<https://doi.org/10.1021/jo034808c>

**Table S4.** Solvent parameters and Stokes shift values of fluorophores

| Solvent     | $\epsilon_r$ | $n$    | $f$   | $\Delta\nu$ ( <b>2c</b> ) | $\Delta\nu$ ( <b>2i</b> ) |
|-------------|--------------|--------|-------|---------------------------|---------------------------|
| PhMe        | 2.38         | 1.4969 | 0.013 | 3703                      | 3049                      |
| 1,4-Dioxane | 2.25         | 1.4224 | 0.025 | 4530                      | 3965                      |
| DCM         | 8.93         | 1.4241 | 0.217 | 5270                      | 4051                      |
| THF         | 7.53         | 1.4073 | 0.209 | 5167                      | 4536                      |
| EtOAc       | 6.02         | 1.3724 | 0.200 | 5335                      | 4553                      |
| AcOH        | 6.15         | 1.3716 | 0.202 | 5849                      | 4258                      |
| EtOH        | 24.5         | 1.3614 | 0.289 | 6016                      | 4503                      |
| Pyridine    | 12.4         | 1.5102 | 0.212 | 5461                      | 4447                      |
| Acetone     | 20.7         | 1.3587 | 0.284 | 6207                      | 5526                      |
| MeCN        | 37.5         | 1.3441 | 0.305 | 6599                      | 5631                      |
| DMSO        | 46.7         | 1.4783 | 0.263 | 6245                      | 5371                      |
